# Supplementary material for: Intramolecular hydrogen transfer in DNA induced by site-selective resonant core excitation
Source: Royal Society of Chemistry journal article supplement (doi:10.1039/d1cp05741c), 2022-01-01
Supplement: d1cp05741c1.pdf [file d1cp05741c1.pdf]

Supplementary information: Intramolecular  
hydrogen transfer in DNA induced by  
site-selective resonant core excitation

December 16, 2021

Table 1: Transition analysis at the carbon K-edge. Excitation energies are given in eV.  $f$  is the oscillator strength and  $L$  is the lowest unoccupied molecular orbital (LUMO). Only transitions with the high amplitudes are given.

| excitation center | excitation energy (f) | transition (amplitude)       |
|-------------------|-----------------------|------------------------------|
| <i>FU - C6</i>    | 287.01 (0.059)        | $1s \rightarrow L+2$ (0.97)  |
| <i>A - C5</i>     | 287.17 (0.033)        | $1s \rightarrow L+1$ (0.91)  |
| <i>A - C8</i>     | 287.36 (0.06)         | $1s \rightarrow L+1$ (0.61)  |
| <i>A - C2</i>     | 287.53 (0.07)         | $1s \rightarrow L+1$ (0.94)  |
| <i>A - C4</i>     | 287.61 (0.056)        | $1s \rightarrow L+0$ (0.87)  |
| <i>G - C8</i>     | 287.65 (0.052)        | $1s \rightarrow L+6$ (0.63)  |
| <i>G - C4</i>     | 287.9 (0.051)         | $1s \rightarrow L+3$ (0.63)  |
| <i>FU - C5</i>    | 288.11 (0.04)         | $1s \rightarrow L+2$ (0.92)  |
| <i>A - C6</i>     | 288.32 (0.073)        | $1s \rightarrow L+0$ (0.94)  |
| <i>FU - C4</i>    | 288.48 (0.062)        | $1s \rightarrow L+2$ (0.88)  |
| <i>G - C6</i>     | 288.56 (0.067)        | $1s \rightarrow L+3$ (0.83)  |
| <i>G - C2</i>     | 289.13 (0.078)        | $1s \rightarrow L+6$ (0.83)  |
| <i>G - C5'</i>    | 289.71 (0.05)         | $1s \rightarrow L+11$ (0.58) |
| <i>FU - C2</i>    | 289.72 (0.082)        | $1s \rightarrow L+5$ (0.95)  |
| <i>A - C5'</i>    | 289.91 (0.048)        | $1s \rightarrow L+7$ (0.77)  |
| <i>FU - C3'</i>   | 289.97 (0.056)        | $1s \rightarrow L+7$ (0.7)   |
| <i>A - C4'</i>    | 290.45 (0.043)        | $1s \rightarrow L+13$ (0.59) |
| <i>A - C3'</i>    | 290.47 (0.033)        | $1s \rightarrow L+11$ (0.46) |
| <i>FU - C4'</i>   | 290.48 (0.048)        | $1s \rightarrow L+12$ (0.34) |
| <i>FU - C6</i>    | 290.7 (0.028)         | $1s \rightarrow L+12$ (0.84) |

Table 2: Transition analysis at the nitrogen K-edge. Excitation energies are given in eV.  $f$  is the oscillator strength and  $L$  is the lowest unoccupied molecular orbital (LUMO). Only transitions with the high amplitudes are given.

| excitation center | excitation energy (f) | transition (amplitude)       |
|-------------------|-----------------------|------------------------------|
| <i>A - N7</i>     | 400.11 (0.042)        | $1s \rightarrow L+0$ (0.77)  |
| <i>A - N3</i>     | 400.19 (0.046)        | $1s \rightarrow L+1$ (0.81)  |
| <i>G - N7</i>     | 400.22 (0.044)        | $1s \rightarrow L+3$ (0.62)  |
| <i>G - N3</i>     | 400.96 (0.033)        | $1s \rightarrow L+3$ (0.6)   |
| <i>A - N6</i>     | 401.91 (0.02)         | $1s \rightarrow L+0$ (0.97)  |
| <i>G - N2</i>     | 401.98 (0.018)        | $1s \rightarrow L+6$ (0.89)  |
| <i>FU - N3</i>    | 402.19 (0.021)        | $1s \rightarrow L+2$ (0.94)  |
| <i>A - N9</i>     | 402.34 (0.029)        | $1s \rightarrow L+1$ (0.77)  |
| <i>A - N1</i>     | 402.58 (0.031)        | $1s \rightarrow L+0$ (0.86)  |
| <i>G - N1</i>     | 402.72 (0.022)        | $1s \rightarrow L+3$ (0.79)  |
| <i>G - N9</i>     | 402.86 (0.032)        | $1s \rightarrow L+6$ (0.86)  |
| <i>FU - N1</i>    | 402.9 (0.019)         | $1s \rightarrow L+2$ (0.93)  |
| <i>A - N6</i>     | 404.63 (0.015)        | $1s \rightarrow L+8$ (0.87)  |
| <i>G - N1</i>     | 404.67 (0.027)        | $1s \rightarrow L+14$ (0.84) |
| <i>FU - N3</i>    | 405.36 (0.024)        | $1s \rightarrow L+24$ (0.46) |
| <i>A - N1</i>     | 405.43 (0.027)        | $1s \rightarrow L+8$ (0.81)  |
| <i>A - N6</i>     | 405.47 (0.028)        | $1s \rightarrow L+10$ (0.6)  |
| <i>FU - N1</i>    | 406.5 (0.018)         | $1s \rightarrow L+15$ (0.54) |

Table 3: Transition analysis at the oxygen K-edge. Excitation energies are given in eV.  $f$  is the oscillator strength and  $L$  is the lowest unoccupied molecular orbital (LUMO). Only transitions with the high amplitudes are given.

| excitation center | excitation energy (f) | transition (amplitude)       |
|-------------------|-----------------------|------------------------------|
| <i>FU - O4</i>    | 531.61 (0.038)        | $1s \rightarrow L+2$ (0.9)   |
| <i>G - O6</i>     | 532.15 (0.027)        | $1s \rightarrow L+3$ (0.72)  |
| <i>FU - O2</i>    | 532.91 (0.033)        | $1s \rightarrow L+5$ (0.95)  |
| <i>O4''</i>       | 534.37 (0.018)        | $1s \rightarrow L+11$ (0.59) |
| <i>O2''</i>       | 534.7 (0.024)         | $1s \rightarrow L+7$ (0.86)  |
| <i>A - O4'</i>    | 536.66 (0.028)        | $1s \rightarrow L+13$ (0.53) |
| <i>FU - O4'</i>   | 537.06 (0.028)        | $1s \rightarrow L+16$ (0.34) |
| <i>A - O5'</i>    | 537.24 (0.039)        | $1s \rightarrow L+13$ (0.7)  |
| <i>FU - O3'</i>   | 537.25 (0.036)        | $1s \rightarrow L+12$ (0.47) |
| <i>O1''</i>       | 537.29 (0.043)        | $1s \rightarrow L+17$ (0.51) |
| <i>G - O5'</i>    | 537.45 (0.032)        | $1s \rightarrow L+9$ (0.34)  |
| <i>FU - O4'</i>   | 537.68 (0.027)        | $1s \rightarrow L+20$ (0.24) |

Table 4: Transition analysis at the fluorine K-edge. Excitation energies are given in eV.  $f$  is the oscillator strength and  $L$  is the lowest unoccupied molecular orbital (LUMO). Only transitions with the high amplitudes are given.

| excitation center | excitation energy ( $f$ ) | transition (amplitude)       |
|-------------------|---------------------------|------------------------------|
| $FU - F5$         | 688.9 (0.035)             | $1s \rightarrow L+12$ (0.57) |

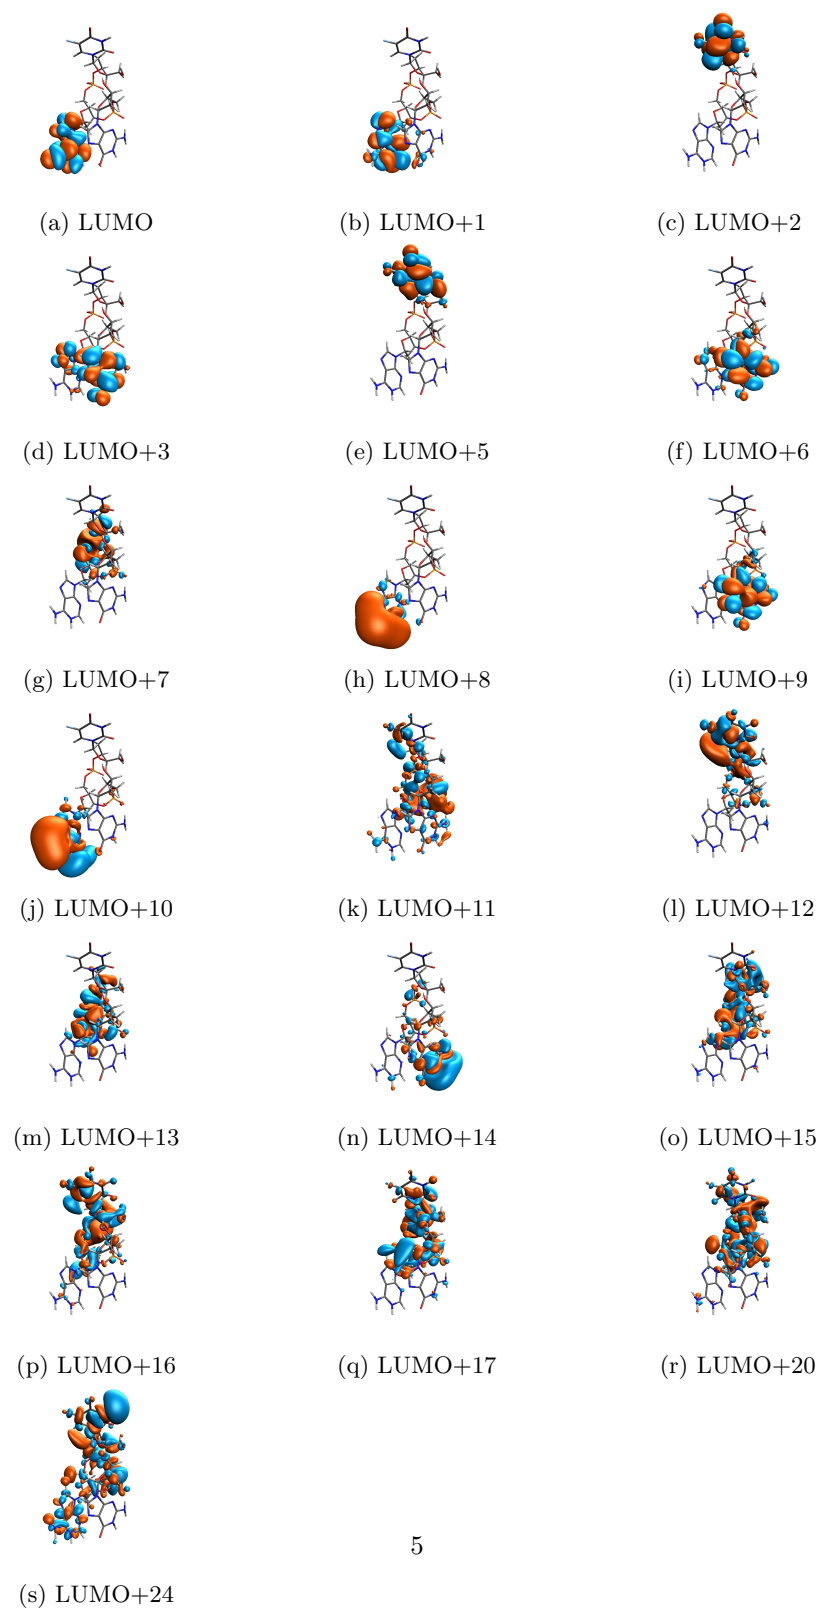

Figure 1: Canonical orbitals for the most relevant excited states with isosurface of 0.05 au.
